# Supplementary material for: Transcatheter aortic valve implantation vs. surgical aortic valve replacement for treatment of symptomatic severe aortic stenosis: an updated meta-analysis
Source: Oxford University Press journal article supplement (doi:10.1093/eurheartj/ehz275), 2019-04-20
Supplement: eurheartj_40_38_3143_s8.pdf [file eurheartj_40_38_3143_s8.pdf]

## SUPPLEMENTARY MATERIAL

**Supplementary section 1:** Search algorithms.

**Supplementary section 2:** Flow diagram for the identification and selection of randomised controlled trials comparing TAVI vs. SAVR.

**Supplementary section 3:** Risk of bias assessment according to the Cochrane Risk of Bias tool.

**Supplementary section 4:** Number of events and risk estimates across the trials for the primary outcome of all-cause mortality up to 2 years and for longer follow-up where available.

**Supplementary section 5:** Risk estimates across the trials for stratified analysis of the primary outcome of all-cause mortality.

**Supplementary section 6:** Number of events and risk estimates across the trials for secondary outcomes.

**Supplementary section 7:** Random-effects meta-analysis of all-cause mortality for the longest available follow-up period.

## Supplementary section 1: Search algorithms.

### Medline

- 1 TRANSCATHETER AORTIC VALVE REPLACEMENT/ 3363
- 2 "transcatheter aortic valve".ab,ti. 7369
- 3 (TAVI or TAVR).ab,ti. 5444
- 4 1 or 2 or 3 8542
- 5 AORTIC VALVE/su 14219
- 6 AORTIC VALVE STENOSIS/su 10719
- 7 "surgical aortic valve".ab,ti. 1523
- 8 SAVR.ab,ti. 655
- 9 5 or 6 or 7 or 8 21810
- 10 4 and 9 4790
- 11 limit 10 to (clinical trial, all or clinical trial or controlled clinical trial or pragmatic clinical trial or randomized controlled trial) 269
- 12 trial.ti. 195624
- 13 10 and 12 106
- 14 11 or 13 299
- 15 limit 14 to yr="2016-Current" 125

### Embase

- 1 TRANSCATHETER AORTIC VALVE IMPLANTATION/ 17159
- 2 "transcatheter aortic valve".ab,ti. 13753
- 3 (TAVI or TAVR).ab,ti. 12742
- 4 1 or 2 or 3 19241
- 5 AORTA VALVE REPLACEMENT/ 18424
- 6 AORTIC VALVE REPLACEMENT/ 3042
- 7 AORTIC STENOSIS/ 4075
- 8 AORTIC VALVE STENOSIS/ 1997
- 9 SURGERY/ 478704
- 10 5 or 6 or 7 or 8 26350
- 11 9 and 10 2786
- 12 SURGICAL AORTIC VALVE REPLACEMENT/ 219
- 13 "surgical aortic valve".ab,ti. 2795
- 14 SAVR.ab,ti. 1304
- 15 11 or 12 or 13 or 14 5413
- 16 4 and 15 2877
- 17 limit 16 to (clinical trial or randomized controlled trial or controlled clinical trial) 171
- 18 trial.ti. 263178
- 19 16 and 18 105
- 20 17 or 19 227
- 21 limit 20 to yr="2016-Current" 115"

### CENTRAL

- 1 "Transcatheter aortic valve" (MeSH) 684
- 2 TAVI or TAVR 568

**3** "Surgical aortic valve" 187

**4** SAVR 110

**5** #1 or #2 734

**6** #3 or #4 195

**7** #5 and #6 93

with Publication Year from 2016 to 2019, in Trials

**Supplementary section 2: Flow diagram for the identification and selection of randomised controlled trials comparing TAVI vs. SAVR.**

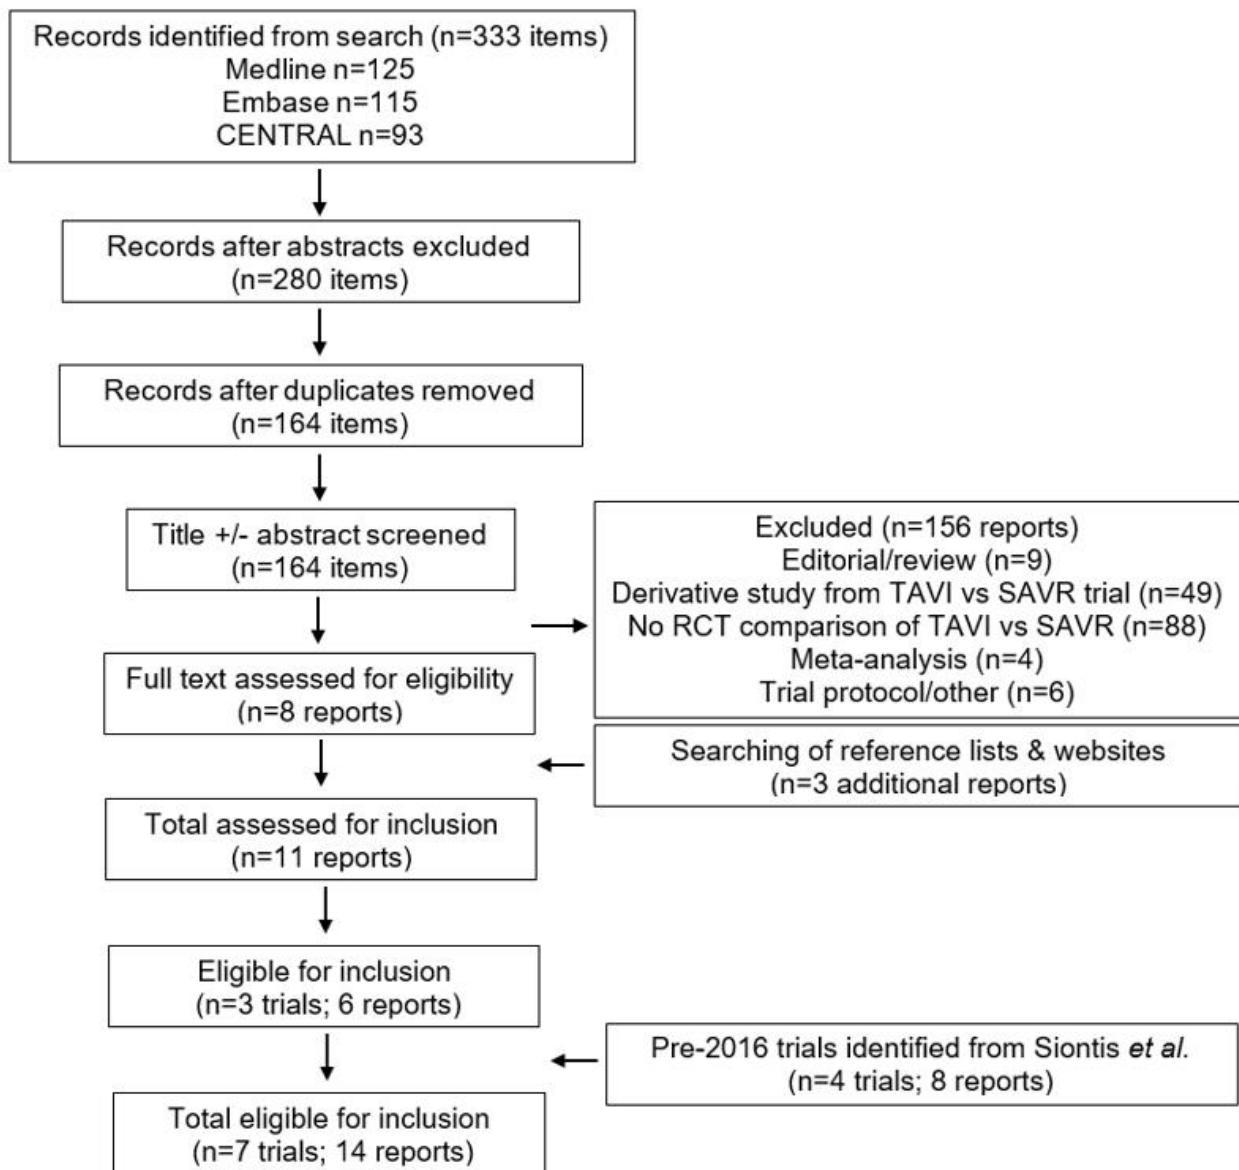

**Supplementary section 3: Risk of bias assessment according to the Cochrane Risk of Bias tool.**

| TRIAL                  | Sequence generation | Allocation concealment | Blinding of outcome assessment | Incomplete outcome data | Selective outcome reporting |                                                                                                                                                                                                                                                             |
|------------------------|---------------------|------------------------|--------------------------------|-------------------------|-----------------------------|-------------------------------------------------------------------------------------------------------------------------------------------------------------------------------------------------------------------------------------------------------------|
| PARTNER 1A             | ✓                   | ?                      | ✓                              | ✓                       | ✓                           | <div style="background-color: #c8e6c9; padding: 2px; margin-bottom: 2px;">Low risk</div> <div style="background-color: #fff9c4; padding: 2px; margin-bottom: 2px;">Unclear risk</div> <div style="background-color: #ffcdd2; padding: 2px;">High risk</div> |
| US CoreValve high risk | ✓                   | ?                      | ?                              | ✓                       | ✓                           |                                                                                                                                                                                                                                                             |
| NOTION                 | ✓                   | ✓                      | X                              | ✓                       | ✓                           |                                                                                                                                                                                                                                                             |
| PARTNER 2A             | ✓                   | ?                      | ?                              | ✓                       | ✓                           |                                                                                                                                                                                                                                                             |
| SURTAVI                | ✓                   | ?                      | ?                              | ✓                       | ✓                           |                                                                                                                                                                                                                                                             |
| PARTNER 3              | ✓                   | ?                      | ✓                              | ✓                       | ✓                           |                                                                                                                                                                                                                                                             |
| Evolut low risk        | ✓                   | ?                      | X                              | ✓                       | ✓                           |                                                                                                                                                                                                                                                             |

**Supplementary section 4: Number of events and risk estimates across the trials for the primary outcome of all-cause mortality up to 2 years and for longer follow-up where available.**

| <b>Trial</b>           | <b>Analysis</b>    | <b>Follow-up</b> | <b>TAVI</b> | <b>SAVR</b> | <b>Events TAVI</b> | <b>Events SAVR</b> | <b>Metric</b> | <b>Estimate (95%CI)</b> |
|------------------------|--------------------|------------------|-------------|-------------|--------------------|--------------------|---------------|-------------------------|
| PARTNER 1A             | Intention-to-treat | 2 years          | 348         | 351         | 116                | 114                | HR            | 0.90 (0.71-1.15)        |
| PARTNER 1A             | Intention-to-treat | 5 years          | 348         | 351         | 229                | 198                | HR            | 1.04 (0.86-1.24)        |
| US CoreValve high risk | Intention-to-treat | 2 years          | 394         | 401         | 55                 | 75                 | RR            | 0.79 (0.61-1.01)        |
| US CoreValve high risk | As treated         | 5 years          | 391         | 359         | 208                | 184                | HR            | 0.93 (0.77-1.14)        |
| NOTION                 | Intention-to-treat | 2 years          | 145         | 135         | 11                 | 14                 | HR            | 0.72 (0.33-1.59)        |
| NOTION                 | Intention-to-treat | 5 years          | 145         | 135         | 40                 | 39                 | RR            | 0.96 (0.66-1.39)        |
| PARTNER 2A             | Intention-to-treat | 2 years          | 1011        | 1021        | 166                | 170                | HR            | 0.92 (0.74-1.13)        |
| SURTAVI                | Intention-to-treat | 2 years          | 879         | 867         | nd                 | nd                 | IRR           | 0.98 (0.72-1.34)        |
| PARTNER 3              | As treated         | 1 year           | 496         | 454         | 5                  | 11                 | HR            | 0.41 (0.14-1.17)        |
| Evolut low risk        | Intention-to-treat | 1 year           | 734         | 734         | nd                 | nd                 | IRR           | 0.83 (0.41-1.67)        |

**Abbreviations:** TAVI, transcatheter aortic valve implantation; SAVR, surgical aortic valve replacement; HR, hazard ratio; RR, risk ratio; IRR, incidence rate ratio; CI, confidence interval.

**Supplementary section 5: Risk estimates across the trials for stratified analysis of the primary outcome of all-cause mortality.**

|                      | <b>Trial</b>           | <b>Follow-up</b> | <b>Subgroup</b>    | <b>Estimate (95%CI)</b> |
|----------------------|------------------------|------------------|--------------------|-------------------------|
| <b>Surgical risk</b> | PARTNER 1A             | 2 years          | High-risk          | 0.90 (0.71-1.15)        |
|                      | US CoreValve high risk | 2 years          | High-risk          | 0.79 (0.61-1.01)        |
|                      | NOTION                 | 2 years          | Low-risk           | 0.72 (0.33-1.59)        |
|                      | PARTNER 2A             | 2 years          | Intermediate risk  | 0.92 (0.74-1.13)        |
|                      | SURTAVI                | 2 years          | Intermediate risk  | 0.98 (0.72-1.34)        |
|                      | PARTNER 3              | 1 year           | Low-risk           | 0.41 (0.14-1.17)        |
|                      | Evolut low risk        | 1 year           | Low-risk           | 0.83 (0.41-1.67)        |
| <b>Access route</b>  | PARTNER 1A             | 2 years          | Transfemoral       | 0.84 (0.63-1.13)        |
|                      | PARTNER 1A             | 2 years          | Transthoracic      | 1.06 (0.69-1.63)        |
|                      | US CoreValve high risk | 2 years          | Transfemoral       | 0.79 (0.61-1.01)        |
|                      | NOTION                 | 2 years          | Transfemoral       | 0.72 (0.33-1.59)        |
|                      | PARTNER 2A             | 2 years          | Transfemoral       | 0.80 (0.62-1.04)        |
|                      | PARTNER 2A             | 2 years          | Transthoracic      | 1.26 (0.86-1.86)        |
|                      | SURTAVI                | 2 years          | Transfemoral       | 0.98 (0.72-1.34)        |
|                      | PARTNER 3              | 1 year           | Transfemoral       | 0.41 (0.14-1.17)        |
| Evolut low risk      | 1 year                 | Transfemoral     | 0.83 (0.41-1.67)   |                         |
| <b>THV system</b>    | PARTNER 1A             | 2 years          | Balloon-expandable | 0.90 (0.71-1.15)        |
|                      | US CoreValve high risk | 2 years          | Self-expandable    | 0.79 (0.61-1.01)        |
|                      | NOTION                 | 2 years          | Self-expandable    | 0.72 (0.33-1.59)        |
|                      | PARTNER 2A             | 2 years          | Balloon-expandable | 0.92 (0.74-1.13)        |
|                      | SURTAVI                | 2 years          | Self-expandable    | 0.98 (0.72-1.34)        |
|                      | PARTNER 3              | 1 year           | Balloon-expandable | 0.41 (0.14-1.17)        |
|                      | Evolut low risk        | 1 year           | Self-expandable    | 0.83 (0.41-1.67)        |

**Abbreviations:** THV, transcatheter heart valve; CI, confidence interval.

## Supplementary section 6: Number of events and risk estimates across the trials for secondary outcomes.

|                             | Analysis           | Follow-up | TAVI | SAVR | Events<br>TAVI | Events<br>SAVR | Metric | Estimate (95%CI) |
|-----------------------------|--------------------|-----------|------|------|----------------|----------------|--------|------------------|
| <b>Any stroke</b>           |                    |           |      |      |                |                |        |                  |
| PARTNER 1A                  | Intention-to-treat | 2 years   | 348  | 351  | 24             | 14             | HR     | 1.22 (0.67-2.23) |
| US CoreValve high risk      | As treated         | 2 years   | 391  | 359  | 40             | 52             | RR     | 0.70 (0.48-1.04) |
| NOTION                      | Intention-to-treat | 2 years   | 145  | 135  | 5              | 7              | RR     | 0.65 (0.21-2.05) |
| PARTNER 2A                  | Intention-to-treat | 2 years   | 1011 | 1021 | 91             | 85             | HR     | 0.93 (0.65-1.33) |
| SURTAVI                     | Intention-to-treat | 2 years   | 879  | 867  | nd             | nd             | IRR    | 0.74 (0.51-1.07) |
| PARTNER 3                   | As treated         | 1 year    | 496  | 454  | 6              | 14             | HR     | 0.38 (0.15-1.00) |
| Evolut low risk             | Intention-to-treat | 1 year    | 734  | 734  | nd             | nd             | IRR    | 0.95 (0.56-1.63) |
| <b>Disabling stroke</b>     |                    |           |      |      |                |                |        |                  |
| PARTNER 1A                  | Intention-to-treat | 30 days   | 348  | 351  | 13             | 7              | RR     | 1.87 (0.76-4.64) |
| US CoreValve high risk      | As treated         | 2 years   | 391  | 359  | 25             | 30             | RR     | 0.77 (0.46-1.28) |
| PARTNER 2A                  | Intention-to-treat | 2 years   | 1011 | 1021 | 59             | 61             | RR     | 0.98 (0.69-1.38) |
| SURTAVI                     | Intention-to-treat | 2 years   | 879  | 867  | nd             | nd             | IRR    | 0.58 (0.32-1.04) |
| PARTNER 3                   | As treated         | 1 year    | 496  | 454  | 1              | 4              | HR     | 0.22 (0.03-2.00) |
| Evolut low risk             | Intention-to-treat | 1 year    | 734  | 734  | nd             | nd             | IRR    | 0.38 (0.14-1.04) |
| <b>Cardiovascular death</b> |                    |           |      |      |                |                |        |                  |
| PARTNER 1A                  | Intention-to-treat | 2 years   | 348  | 351  | 67             | 59             | RR     | 1.15 (0.83-1.57) |
| US CoreValve high risk      | As treated         | 2 years   | 391  | 359  | 58             | 64             | RR     | 0.83 (0.60-1.15) |
| NOTION                      | As treated         | 2 years   | 142  | 134  | 9              | 12             | RR     | 0.71 (0.31-1.63) |
| PARTNER 2A                  | Intention-to-treat | 2 years   | 1011 | 1021 | 97             | 104            | RR     | 0.94 (0.72-1.23) |
| SURTAVI                     | Intention-to-treat | 2 years   | 879  | 867  | nd             | nd             | IRR    | 0.96 (0.66-1.40) |
| PARTNER 3                   | As treated         | 1 year    | 496  | 454  | 4              | 9              | HR     | 0.40 (0.12-1.30) |
| Evolut low risk             | Intention-to-treat | 1 year    | 734  | 734  | nd             | nd             | IRR    | 0.65 (0.30-1.42) |



**Myocardial infarction**

|                        |                    |         |      |      |    |    |     |                  |
|------------------------|--------------------|---------|------|------|----|----|-----|------------------|
| PARTNER 1A             | Intention-to-treat | 2 years | 348  | 351  | 0  | 4  | RR  | 0.11 (0.01-2.07) |
| US CoreValve high risk | As treated         | 2 years | 391  | 359  | 7  | 7  | RR  | 0.92 (0.32-2.58) |
| NOTION                 | Intention-to-treat | 2 years | 145  | 135  | 8  | 7  | HR  | 1.06 (0.38-2.92) |
| PARTNER 2A             | Intention-to-treat | 2 years | 1011 | 1021 | 33 | 37 | RR  | 0.90 (0.57-1.43) |
| SURTA VI               | Intention-to-treat | 2 years | 879  | 867  | nd | nd | IRR | 1.27 (0.63-2.57) |
| PARTNER 3              | As treated         | 1 year  | 496  | 454  | 6  | 10 | HR  | 0.54 (0.20-1.49) |
| Evolut low risk        | Intention-to-treat | 1 year  | 734  | 734  | nd | nd | IRR | 1.06 (0.44-2.56) |

**Acute kidney injury**

|                        |                    |         |      |      |    |    |     |                  |
|------------------------|--------------------|---------|------|------|----|----|-----|------------------|
| PARTNER 1A             | Intention-to-treat | 2 years | 348  | 351  | 20 | 21 | RR  | 0.96 (0.53-1.74) |
| US CoreValve high risk | As treated         | 2 years | 391  | 359  | 24 | 54 | RR  | 0.41 (0.26-0.64) |
| NOTION                 | Intention-to-treat | 2 years | 145  | 135  | 2  | 3  | RR  | 0.61 (0.10-3.67) |
| PARTNER 2A             | Intention-to-treat | 2 years | 1011 | 1021 | 36 | 57 | RR  | 0.64 (0.42-0.96) |
| SURTA VI               | Intention-to-treat | 2 years | 879  | 867  | nd | nd | IRR | nd               |
| PARTNER 3              | As treated         | 1 year  | 496  | 454  | nd | nd | ND  | nd               |
| Evolut low risk        | As treated         | 1 year  | 734  | 734  | nd | nd | IRR | 0.32 (0.14-0.76) |

**New-onset atrial fibrillation**

|                        |                    |         |      |      |     |     |     |                  |
|------------------------|--------------------|---------|------|------|-----|-----|-----|------------------|
| PARTNER 1A             | Intention-to-treat | 2 years | 348  | 351  | 42  | 60  | RR  | 0.71 (0.49-1.02) |
| US CoreValve high risk | As treated         | 2 years | 391  | 359  | 71  | 121 | RR  | 0.54 (0.42-0.69) |
| NOTION                 | Intention-to-treat | 2 years | 145  | 135  | 32  | 80  | HR  | 0.28 (0.18-0.43) |
| PARTNER 2A             | Intention-to-treat | 2 years | 1011 | 1021 | 110 | 273 | RR  | 0.41 (0.33-0.50) |
| SURTA VI               | Intention-to-treat | 2 years | 879  | 867  | nd  | nd  | .   | nd               |
| PARTNER 3              | As treated         | 1 year  | 496  | 454  | 29  | 150 | HR  | 0.13 (0.09-0.20) |
| Evolut low risk        | As treated         | 1 year  | 734  | 734  | nd  | nd  | IRR | 0.26 (0.21-0.32) |

**Major bleeding**

|            |                    |         |     |     |    |    |    |                  |
|------------|--------------------|---------|-----|-----|----|----|----|------------------|
| PARTNER 1A | Intention-to-treat | 2 years | 348 | 351 | 60 | 95 | RR | 0.64 (0.48-0.85) |
|------------|--------------------|---------|-----|-----|----|----|----|------------------|

|                        |                    |         |      |      |     |     |     |                  |
|------------------------|--------------------|---------|------|------|-----|-----|-----|------------------|
| US CoreValve high risk | As treated         | 2 years | 391  | 359  | 123 | 135 | RR  | 0.83 (0.68-1.02) |
| NOTION                 | Intention-to-treat | 2 years | 145  | 135  | nd  | nd  | RR  | 0.54 (0.31-0.95) |
| PARTNER 2A             | Intention-to-treat | 2 years | 1011 | 1021 | 169 | 471 | RR  | 0.36 (0.31-0.42) |
| SURTA VI               | Intention-to-treat | 2 years | 879  | 867  | nd  | nd  | .   | nd               |
| PARTNER 3              | As treated         | 1 year  | 496  | 454  | 38  | 117 | HR  | 0.25 (0.17-0.37) |
| Evolut low risk        | As treated         | 1 year  | 734  | 734  | nd  | nd  | IRR | 0.36 (0.22-0.58) |

### Major vascular complications

|                        |                    |         |      |      |    |    |     |                   |
|------------------------|--------------------|---------|------|------|----|----|-----|-------------------|
| PARTNER 1A             | Intention-to-treat | 2 years | 348  | 351  | 40 | 13 | RR  | 3.10 (1.69-5.70)  |
| US CoreValve high risk | As treated         | 2 years | 391  | 359  | 27 | 7  | RR  | 3.53 (1.56-8.01)  |
| NOTION                 | Intention-to-treat | 2 years | 145  | 135  | nd | nd | RR  | 3.77 (0.82-17.46) |
| PARTNER 2A             | Intention-to-treat | 2 years | 1011 | 1021 | 86 | 55 | RR  | 1.58 (1.14-2.19)  |
| SURTA VI               | Intention-to-treat | 2 years | 879  | 867  | nd | nd | .   | nd                |
| PARTNER 3              | As treated         | 1 year  | 496  | 454  | 14 | 7  | HR  | 1.83 (0.74-4.55)  |
| Evolut low risk        | As treated         | 1 year  | 734  | 734  | nd | nd | IRR | 1.09 (0.63-1.88)  |

### Valve endocarditis

|                        |                    |         |      |      |    |    |     |                   |
|------------------------|--------------------|---------|------|------|----|----|-----|-------------------|
| PARTNER 1A             | Intention-to-treat | 2 years | 348  | 351  | 4  | 3  | RR  | 1.34 (0.30-5.96)  |
| US CoreValve high risk | As treated         | 2 years | 391  | 359  | 3  | 5  | RR  | 0.55 (0.13-2.28)  |
| NOTION                 | Intention-to-treat | 2 years | 145  | 135  | 9  | 2  | RR  | 4.21 (0.91-19.49) |
| PARTNER 2A             | Intention-to-treat | 2 years | 1011 | 1021 | 11 | 6  | RR  | 1.85 (0.69-4.99)  |
| SURTA VI               | Intention-to-treat | 2 years | 879  | 867  | nd | nd | .   | nd                |
| PARTNER 3              | As treated         | 1 year  | 496  | 454  | 1  | 2  | HR  | 0.44 (0.04-4.89)  |
| Evolut low risk        | Intention-to-treat | 1 year  | 734  | 734  | nd | nd | IRR | 0.50 (0.05-4.76)  |

### Permanent pacemaker implantation

|                        |                    |         |     |     |      |     |    |                    |
|------------------------|--------------------|---------|-----|-----|------|-----|----|--------------------|
| PARTNER 1A             | Intention-to-treat | 2 years | 348 | 351 | 23   | 19  | RR | 1.22 (0.68-2.20)   |
| US CoreValve high risk | As treated         | 2 years | 391 | 359 | 96   | 42  | RR | 2.09 (1.50-2.92)   |
| NOTION                 | Intention-to-treat | 2 years | 145 | 135 | 55.0 | 5.0 | RR | 10.38 (4.29-25.14) |

|                 |                    |         |      |      |     |    |     |                  |
|-----------------|--------------------|---------|------|------|-----|----|-----|------------------|
| PARTNER 2A      | Intention-to-treat | 2 years | 1011 | 1021 | 114 | 96 | RR  | 1.20 (0.93-1.55) |
| SURTAVI         | Intention-to-treat | 30 days | 879  | 867  | nd  | nd | IRR | 3.92 (3.08-4.99) |
| SURTAVI         | Intention-to-treat | 2 years | 879  | 867  | nd  | nd | .   | nd               |
| PARTNER 3       | As treated         | 1 year  | 496  | 454  | 36  | 24 | HR  | 1.38 (0.82-2.32) |
| Evolut low risk | As treated         | 1 year  | 734  | 734  | nd  | nd | IRR | 2.90 (2.16-3.88) |

**Abbreviations:** TAVI, transcatheter aortic valve implantation; SAVR, surgical aortic valve replacement; HR, hazard ratio; RR, risk ratio; IRR, incidence rate ratio; CI, confidence interval.

**Supplementary section 7: Random-effects meta-analysis of all-cause mortality for the longest available follow-up period.**

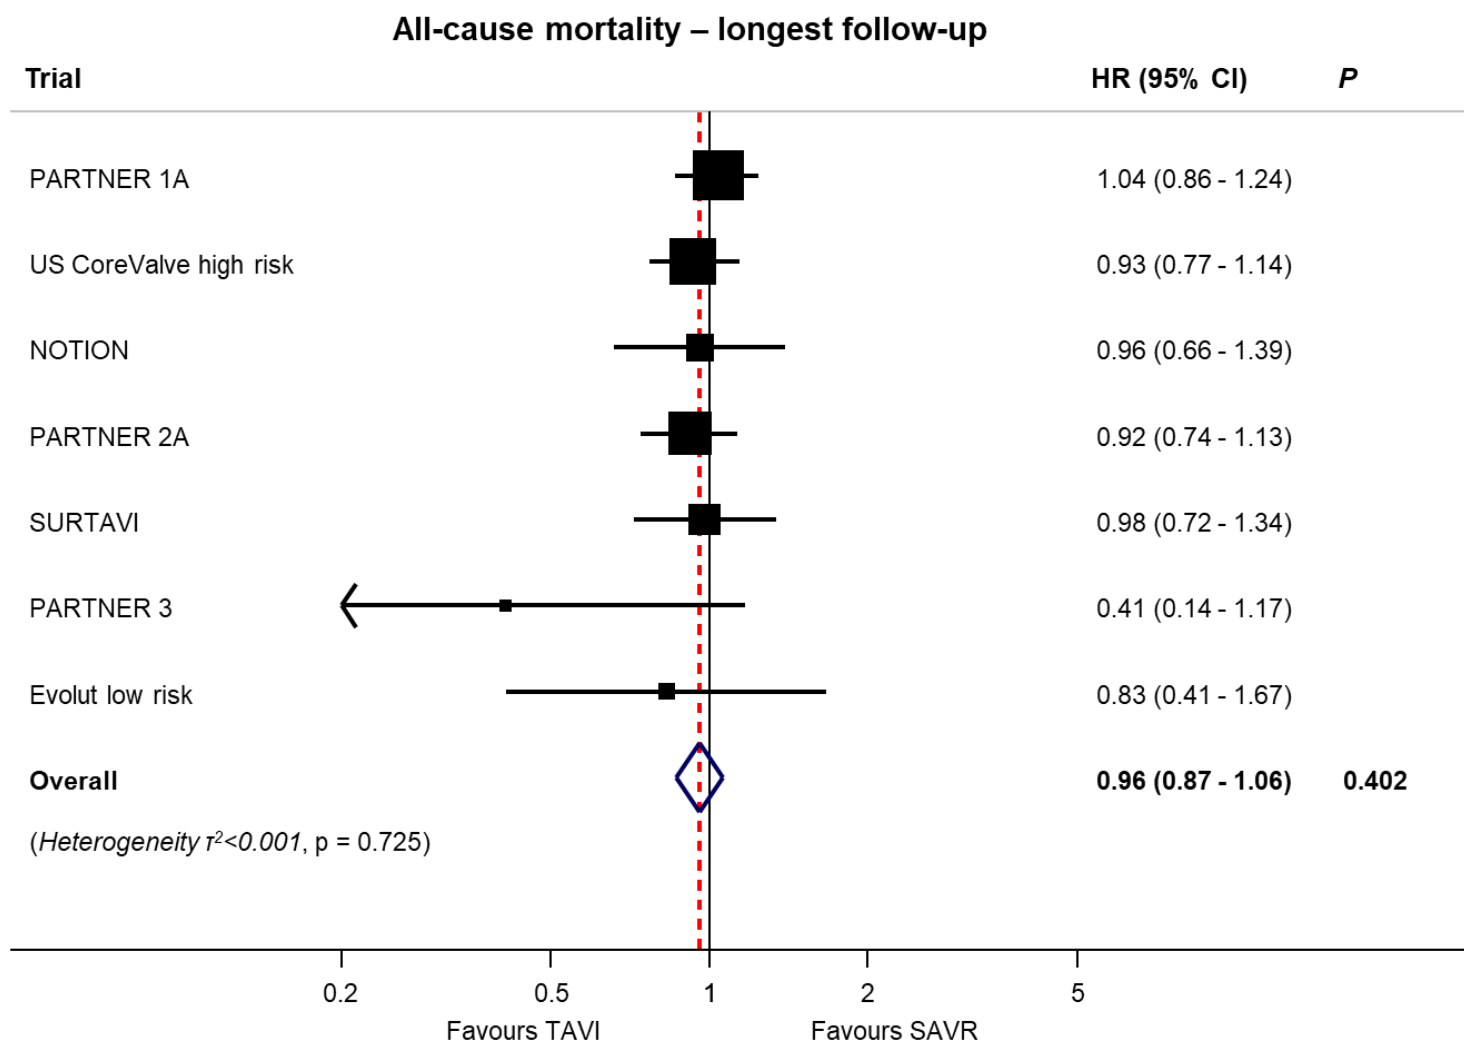

For each trial, boxes and horizontal lines correspond to the respective point estimate and accompanying 95% confidence interval. The size of each box is proportional to weight of that trial result. The vertical solid line on the forest plot represents the point estimate of hazard ratio=1. The vertical dashed line on the plot represents the point estimate of overall hazard ratio derived from random-effects meta-analysis. The diamond represents the 95% confidence interval of the summary pooled estimate of the effect and is centred on pooled hazard ratios. Heterogeneity estimate of  $\tau^2$  accompanies the summary estimate. Details of the data from individual trials are available in Supplementary section 4. Five year data are included for PARTNER 1A, US CoreValve High Risk, and NOTION trials.

**Abbreviations:** HR, hazard ratio; CI, confidence interval; TAVI, transcatheter aortic valve implantation; SAVR, surgical aortic valve replacement.
